# Supplementary material for: Comparative Transcriptomic Analysis of Rhinovirus and Influenza Virus Infection
Source: Front Microbiol. 2020 Jul 21;11:1580. doi: 10.3389/fmicb.2020.01580 (PMC7396524; doi:10.3389/fmicb.2020.01580)
Supplement: Supplementary file 2 [file Data_Sheet_2.XLSX]

## Sheet: mapping statistics
Sample name	fastq_files	genome_coverage	reads_mapping_in_exons	percentage_reads_mapping_in_exons	exon_coverage
1Nil0	1Nil0_1.fastq	1.63804	23091727	72.1392	7.72548
2Nil0	2Nil0_1.fastq	1.57881	22245788	72.9779	7.44675
3FluA0	3FluA0_1.fastq	1.59967	22548249	71.7253	7.54724
4FluA0	4FluA0_1.fastq	1.55948	21985142	71.5361	7.35995
5FluB0	5FluB0_1.fastq	1.77276	25009536	74.8954	8.37165
6FluB0	6FluB0_1.fastq	1.64341	23196968	72.4189	7.76216
7Rhino0	7Rhino0_1.fastq	1.65138	23234735	71.6758	7.77677
8Rhino0	8Rhino0_1.fastq	1.67983	23647244	70.9006	7.91733
9Nil6	9Nil6_1.fastq	1.83115	25867295	73.2415	8.66066
10Nil6	10Nil6_1.fastq	1.52491	21494486	70.8115	7.19617
11FluA6	11FluA6_1.fastq	1.60703	22759818	72.2437	7.61268
12FluA6	12FluA6_1.fastq	1.91143	27047569	73.5493	9.05535
13FluB6	13FluB6_1.fastq	1.48936	21088317	66.2384	7.06203
14FluB6	14FluB6_1.fastq	1.49728	21213686	66.8105	7.10276
15Rhino6	15Rhino6_1.fastq	1.791	25281461	72.1587	8.46363
16Rhino6	16Rhino6_1.fastq	1.78865	25323991	73.2229	8.46879
17Nil12	17Nil12_1.fastq	1.77175	25163309	71.9365	8.40956
18Nil12	18Nil12_1.fastq	1.44116	20461733	73.2366	6.83666
19FluA12	19FluA12_1.fastq	1.50642	21382517	71.1526	7.14691
20FluA12	20FluA12_1.fastq	1.73047	24601469	70.104	8.22179
21FluB12	21FluB12_1.fastq	1.03412	14573927	42.6931	4.87252
22FluB12	22FluB12_1.fastq	0.959805	13494957	41.6224	4.51347
23Rhino12	23Rhino12_1.fastq	1.6675	23618573	72.9158	7.89787
24Rhino12	24Rhino12_1.fastq	1.65799	23527231	71.1476	7.8633
25Nil24	25Nil24_1.fastq	1.52808	21492045	70.2441	7.19464
26Nil24	26Nil24_1.fastq	1.57588	22184322	71.4719	7.42477
27FluA24	27FluA24_1.fastq	1.43138	20041231	65.1614	6.70942
28FluA24	28FluA24_1.fastq	1.46002	20462198	66.6895	6.84942
29FluB24	29FluB24_1.fastq	0.765673	10215052	29.9537	3.41896
30FluB24	30FluB24_1.fastq	0.631242	8506626	27.5025	2.84789
31Rhino24	31Rhino24_1.fastq	1.76221	24970724	70.6945	8.36036
32Rhino24	32Rhino24_1.fastq	1.65133	23427682	70.6933	7.84351
